# Supplementary material for: Single-Step Detection of the Influenza Virus Hemagglutinin Using Bacterially-Produced Quenchbodies
Source: PubMed Central journal article supplement (PMC6338965; doi:10.3390/s19010052), 2018-12-23
Supplement: sensors-19-00052-s001.pdf [file sensors-19-00052-s001.pdf]

Supplementary Information for

# Single-step detection of influenza virus hemagglutinin using bacterially produced Quenchbodies

Hee-Jin Jeong<sup>1</sup>, Jinhua Dong<sup>2,3,4</sup> and Hiroshi Ueda<sup>4,\*</sup>

<sup>1</sup> Department of Biological and Chemical Engineering, College of Science and Technology, Hongik University, Sejong-si, 30016, Korea; heejinjeong@hongik.ac.kr

<sup>2</sup> Key Laboratory of Biological Medicine in Universities of Shandong Province, School of Bioscience and Technology, Weifang Medical University, Weifang 261042, China; dongjh@wfmuc.edu.cn

<sup>3</sup> Tokyo Tech World Research Hub Initiative (WRHI), and

<sup>4</sup> Laboratory for Chemistry and Life Science, Institute for Innovative Research, Tokyo Institute of Technology, Yokohama 226-8503, Japan

\* Correspondence: ueda@res.titech.ac.jp; Tel.: +81-45-924-5248

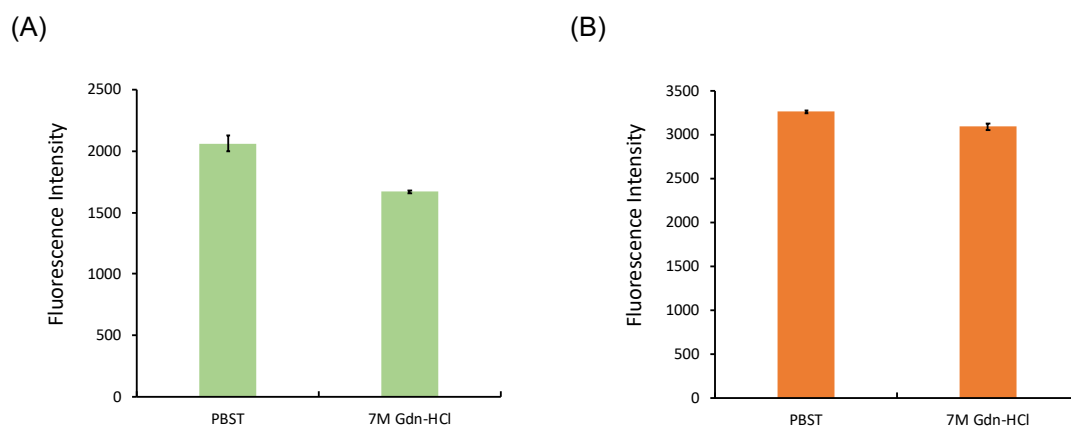

**Figure S1.** Peak fluorescence intensity of free ATTO520-COOH (A) and TAMRA-COOH (B) in PBST and denaturant (7M Gdn-HCl, 100 mM DTT). Excitation wavelength was  $520 \pm 2.5$  nm and  $546 \pm 2.5$  nm, respectively.
